# Supplementary material for: Characterization of Ribosomal Frameshifting in Theiler's Murine Encephalomyelitis Virus
Source: PubMed Central journal article supplement (PMC4524249; doi:10.1128/jvi.01043-15), 2015-06-10

**Supplementary Figure S1. Mass spectrometric analysis of tagged products. (A)** Fragmentation spectrum of the shift-site peptide derived from V5-tagged 2A-2B\*. **(B)** Fragmentation spectrum of a peptide consistent with 3C-Pro cleavage of tagged 2A-2B at the conserved Q|G encoded just downstream of the frameshift site. **(C)** Fragmentation spectrum of the shift-site peptide derived from HA-tagged 2A-2B\*.

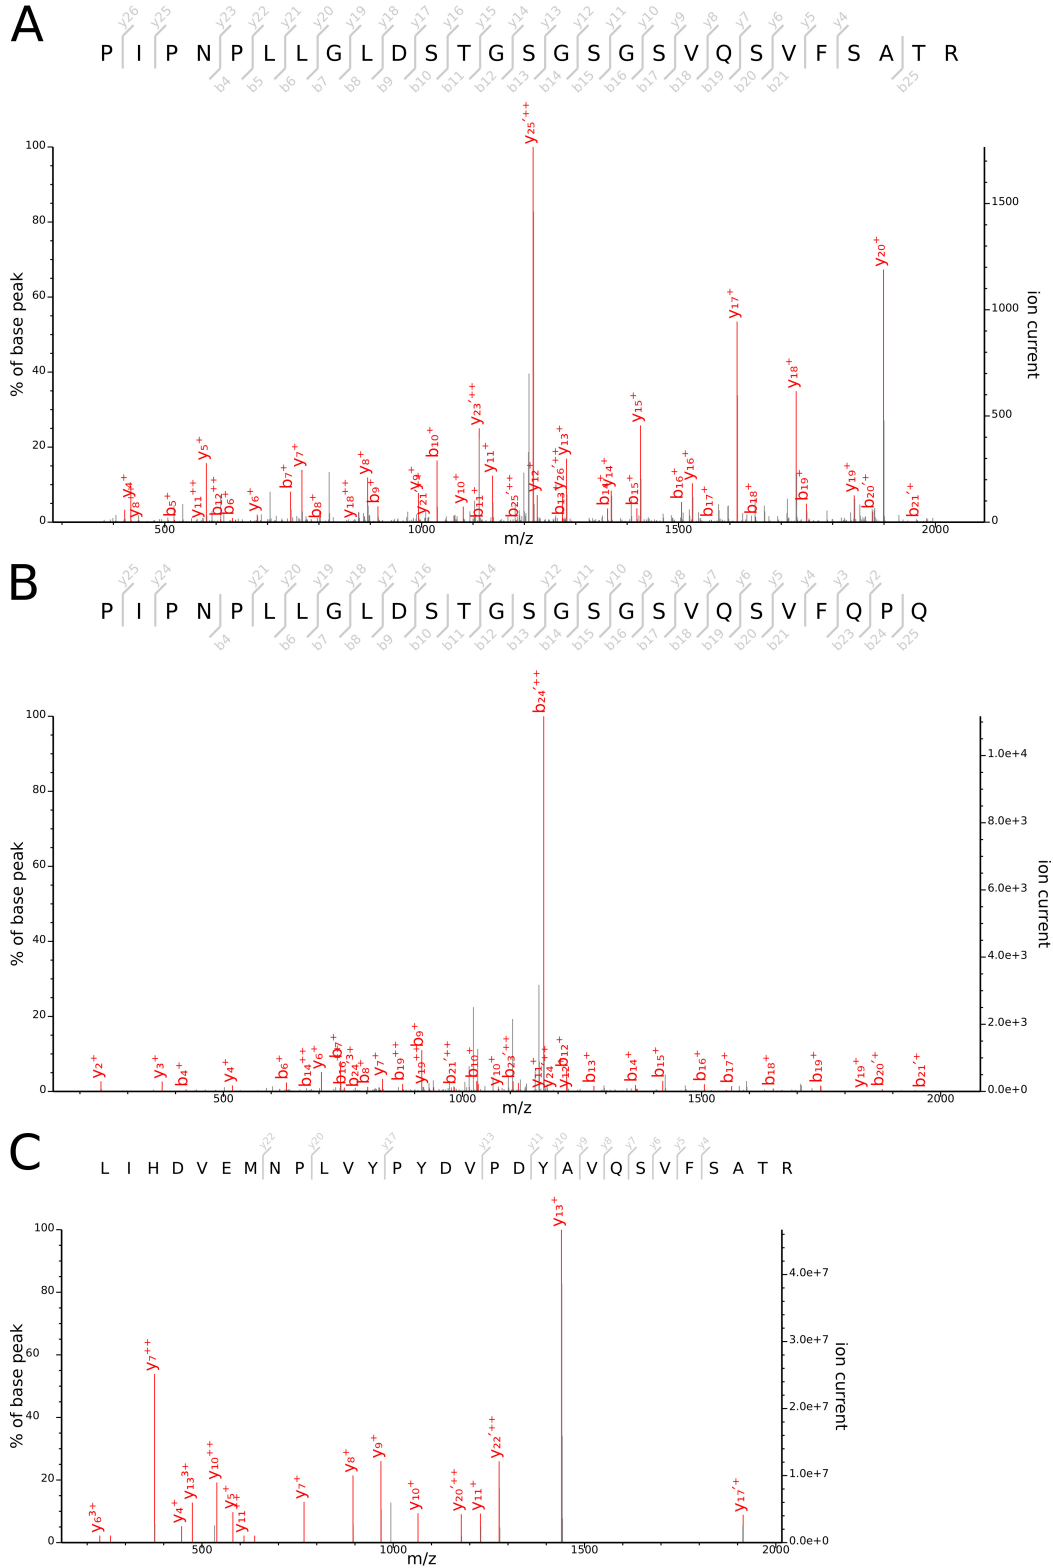

Supplement: JVI.01043-15_zjv999090677so1.pdf [file JVI.01043-15_zjv999090677so1.pdf]
